# Supplementary material
Source: PubMed Central journal article supplement (PMC3177258)
Supplement: supp_pp.111.176214_176214.pdf [file supp_pp.111.176214_176214.pdf]

**A**

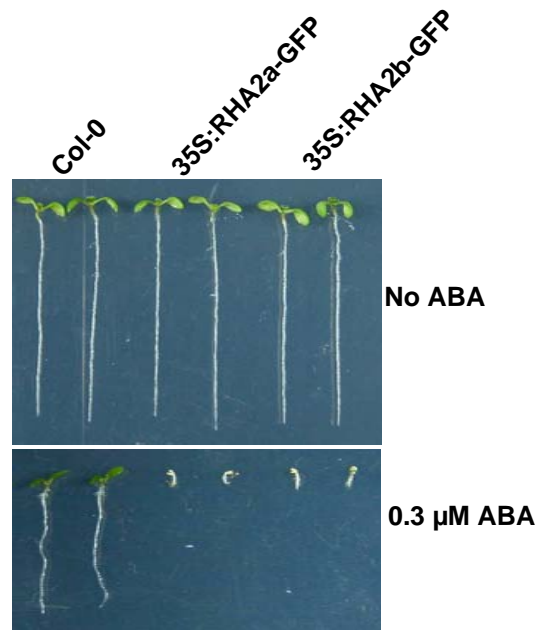

**B**

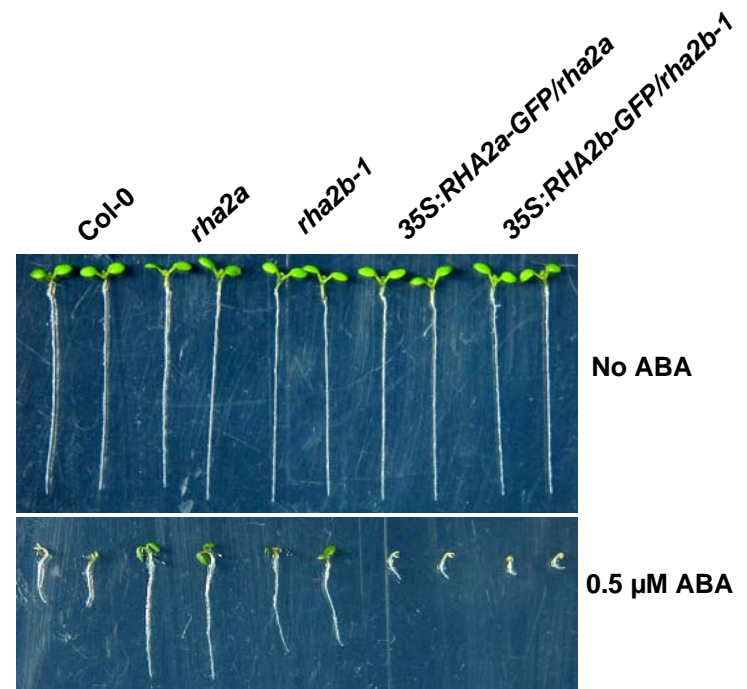

**C**

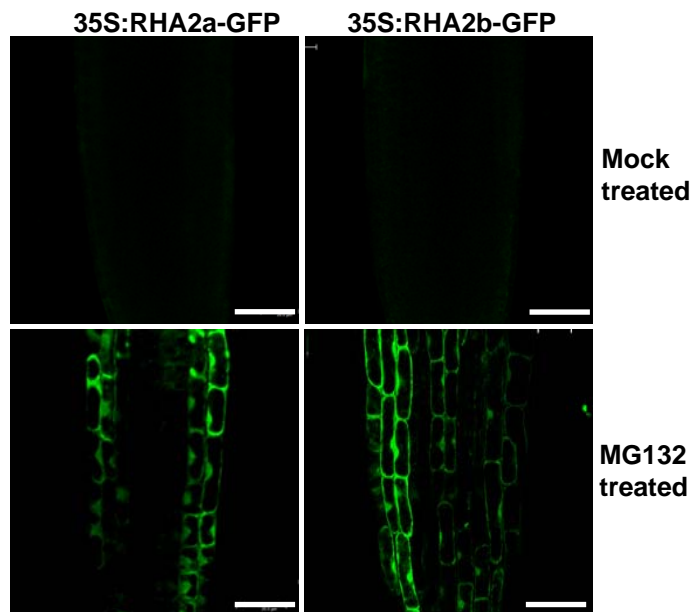

**Supplemental Figure S1.** Subcellular localization of the RHA2b and RHA2a.

A, ABA response of *35S:RHA2a-GFP* and *35S:RHA2b-GFP* transgenic *Arabidopsis* seedlings. Photographs of seedlings grew on medium containing 0 and 0.3  $\mu\text{M}$  ABA at 5 d after the end of stratification.

B, ABA response of *35S:RHA2a-GFP/rha2a* and *35S:RHA2b-GFP/rha2b-1* seedlings. Photographs of seedlings grew on medium containing 0 and 0.5  $\mu\text{M}$  ABA at 5 d after the end of stratification.

C, Photomicrographs of transgenic *Arabidopsis* roots harboring the *35S:RHA2b-GFP* or *35S:RHA2a-GFP* constructs. One-week-old plants treated (or mock treated) with 50  $\mu\text{M}$  MG132 for 6 h under dim light overnight were observed with fluorescence microscopy. Bars=50  $\mu\text{m}$ .

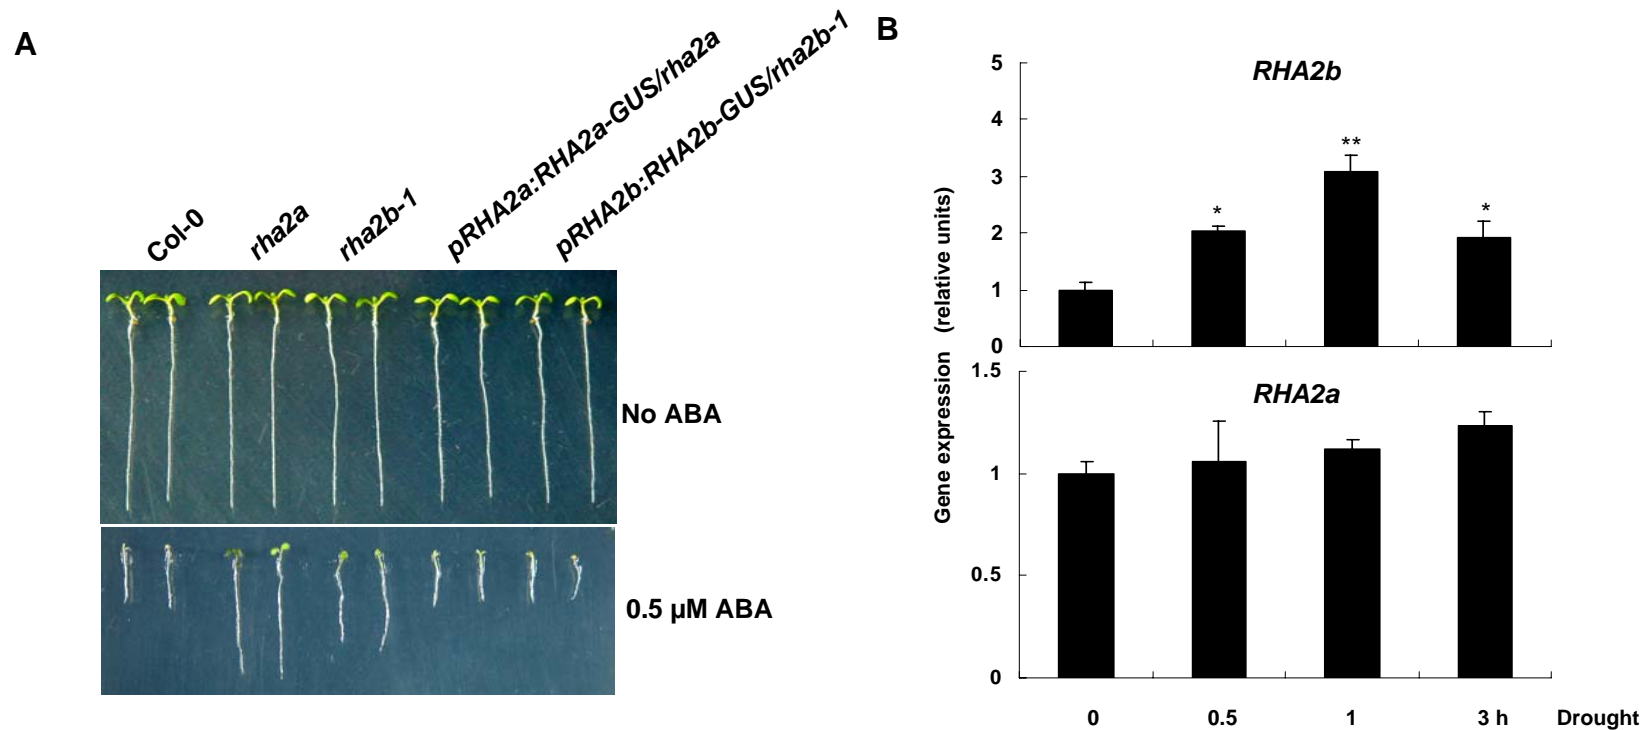

**Supplemental Figure S2.** Comparison of *RHA2b* and *RHA2a* expression.

A, ABA response of *pRHA2a:RHA2a-GUS/rha2a* and *pRHA2b:RHA2b-GUS/rha2b-1* *Arabidopsis* seedlings. Photographs of seedlings grew on medium containing 0 and 0.5 μM ABA at 5 d after the end of stratification.

B, Drought-induced *RHA2b* and *RHA2a* expression revealed by qRT-PCR. Two-week-old wild type seedlings were subjected to drought treatment for 0, 0.5, 1 and 3 h respectively. *ACTIN2* primers were used as an internal control. Data shown are mean ± SD of three independent experiments.

Asterisks in B indicate significance of the difference from the corresponding control values determined by Student's *t*-test (\* 0.01 ≤ *P* < 0.05, \*\* *P* < 0.01).

A

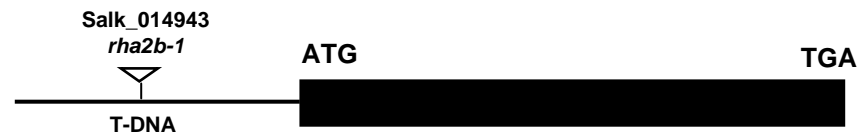

B

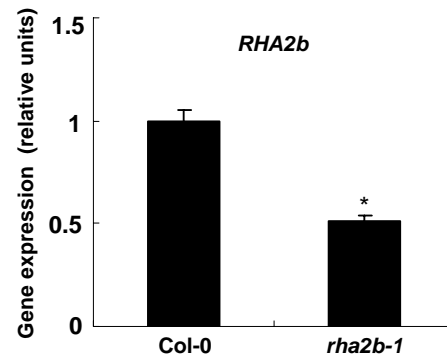

C

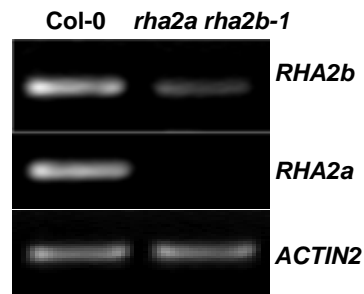

**Supplemental Figure S3.** Molecular analysis of *RHA2b/RHA2a* mutants.

A, Diagram of the *RHA2b* gene. The T-DNA inserted 168-bp upstream of the translation start site in Salk\_014943 (*rha2b-1*).

B, Expression of *RHA2b* in *rha2b-1* revealed by qRT-PCR. *ACTIN2* primers were used as an internal control.

C, RT-PCR analysis showing reduced expression of *RHA2b* and no expression of *RHA2a* in the *rha2a rha2b-1* double mutant. *ACTIN2* primers were used as an internal control.

Asterisk in B indicate significance of the difference from the corresponding control values determined by Student's *t*-test (\*  $0.01 \leq P < 0.05$ ).

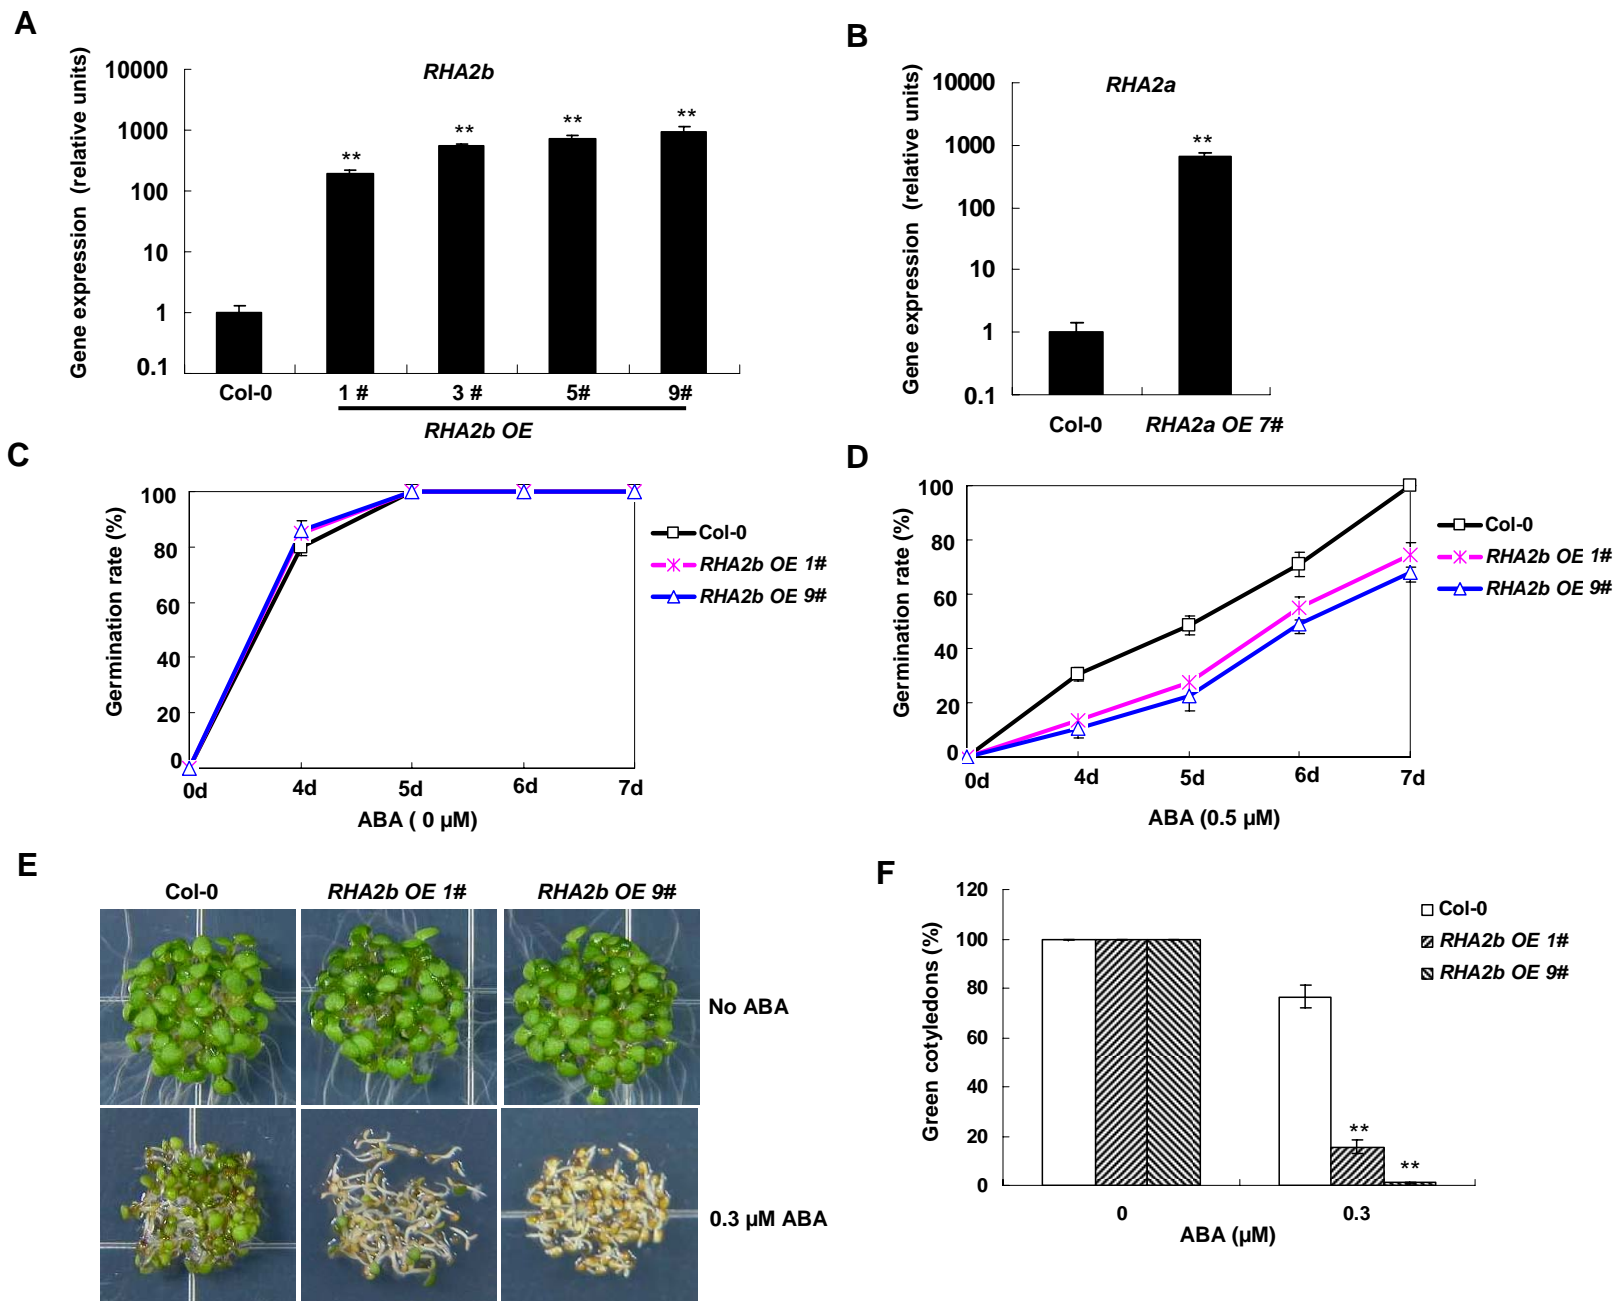

**Supplemental Figure S4.** ABA responses of *RHA2b OE 1#* and *RHA2b OE 9#* plants in seed germination and postgerminative growth.

A, qRT-PCR analysis showing elevated expression of *RHA2b* in *RHA2b* overexpression transgenic lines. *ACTIN2* primers were used as an internal control.

B, qRT-PCR analysis showing elevated expression of *RHA2a* in *RHA2a* overexpression transgenic line 7. *ACTIN2* primers were used as an internal control.

C and D, Seed germination time course of *RHA2b OE 1#* and *RHA2b OE 9#* grown on medium without ABA (C) or containing 0.5  $\mu$ M ABA (D). Data shown are mean  $\pm$  SD of three replicates. At least 100 seeds per genotype were measured in each replicate.

E, Photographs of young seedlings at 5 d after the end of stratification. Seeds were germinated and allowed to grow on horizontal agar media containing 0 and 0.3  $\mu$ M ABA. The pictures were taken at 5 d after the end of stratification.

F, Cotyledon greening percentage of the seedlings described in (E). Values represent mean  $\pm$  SD of three replicates. At least 30 seedlings per genotype were measured in each replicate.

Asterisks in A, B and F indicate significance of the difference from the corresponding wild-type values determined by Student's *t*-test (\*\*  $P < 0.01$ ). At least three independent experiments were conducted and similar results were obtained.

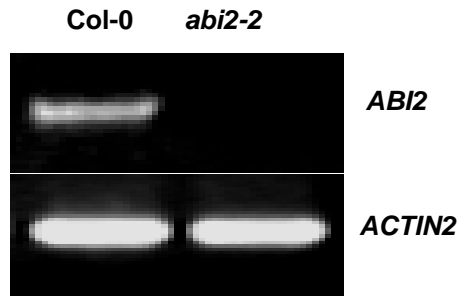

**Supplemental Figure S5.** Expression of *ABI2* in the *abi2-2* (Salk\_015166) mutant. RT-PCR analysis showing no expression of *ABI2* in *abi2-2* mutant. *ACTIN2* primers were used as an internal control.
